# Supplementary material
Source: publisher figshare collection journal article supplement (https://sage.figshare.com/ndownloader/files/20941581)
Supplement: Supplementary file 1 [file 20941581]

## Appendix

Table A1. Parties included in the analysis

| Country        | Party Name                               |
|----------------|------------------------------------------|
| Belgium        | Christian-Democrat and Flemish           |
| Belgium        | Democrat Humanist Centre                 |
| Belgium        | Ecolo                                    |
| Belgium        | Flemish Interest                         |
| Belgium        | Green                                    |
| Belgium        | New Flemish Alliance                     |
| Belgium        | Open Flemish Liberals and Democrats      |
| Belgium        | Reform Movement                          |
| Belgium        | Socialist Party                          |
| Belgium        | Socialist Party Alternative              |
| Czech Republic | Civic Democratic Party                   |
| Czech Republic | Social Democratic Party                  |
| Denmark        | Conservatives                            |
| Denmark        | Danish People's Party                    |
| Denmark        | Liberals                                 |
| Denmark        | New/Liberal Alliance                     |
| Denmark        | Red-Green Alliance                       |
| Denmark        | Social Democrats                         |
| Denmark        | Social Liberal Party                     |
| Denmark        | Socialist People's Party                 |
| Germany        | Christian Democratic Union               |
| Germany        | Free Democratic Party                    |
| Germany        | Social Democratic Party                  |
| Germany        | The Left                                 |
| Ireland        | Fianna Fáil                              |
| Ireland        | Fine Gael                                |
| Ireland        | Labour Party                             |
| Ireland        | Sinn Féin                                |
| Netherlands    | Christian Democratic Appeal              |
| Netherlands    | ChristianUnion                           |
| Netherlands    | Democrats 66                             |
| Netherlands    | GreenLeft                                |
| Netherlands    | Labour Party                             |
| Netherlands    | Party for the Animals                    |
| Netherlands    | People's Party for Freedom and Democracy |
| Netherlands    | Socialist Party                          |
| Norway         | Centre PartyCentre Party                 |
| Norway         | Christian Democratic Party               |
| Norway         | Conservative Party                       |
| Norway         | Labour Party                             |
| Norway         | Liberal Party                            |

1  
2  
3  
4  
5  
6  
7  
8  
9  
10  
11  
12  
13  
14  
15  
16  
17  
18  
19  
20  
21  
22  
23  
24  
25  
26  
27  
28  
29  
30  
31  
32  
33  
34  
35  
36  
37  
38  
39  
40  
41  
42  
43  
44  
45  
46  
47  
48  
49  
50  
51  
52  
53  
54  
55  
56  
57  
58  
59  
60

|                |                                     |
|----------------|-------------------------------------|
| Norway         | Progress Party                      |
| Norway         | Socialist Left Party                |
| Spain          | Democratic Convergence of Catalonia |
| Spain          | People's Party                      |
| Spain          | Socialist Party                     |
| Sweden         | Centre Party                        |
| Sweden         | Green Party                         |
| Sweden         | Left Party                          |
| Sweden         | Liberal People's Party              |
| Sweden         | Moderate Party                      |
| Sweden         | Social Democrats                    |
| United Kingdom | Conservative Party                  |
| United Kingdom | Green Party                         |
| United Kingdom | Labour Party                        |
| United Kingdom | Liberal Democrats                   |
| United Kingdom | Scottish National Party             |

Source: PPDB

Table A2. Main variables used in the analyses: measurement, descriptive statistics, and data source

| Variable Name            | Measurement                                                                                                                                                                                                                                        | Mean   | Standard Deviation | Min    | Max    | Source                                                                                                    |
|--------------------------|----------------------------------------------------------------------------------------------------------------------------------------------------------------------------------------------------------------------------------------------------|--------|--------------------|--------|--------|-----------------------------------------------------------------------------------------------------------|
| Party Supporter          | Supporters are those who self-identified as close to a party and provided the name of the party.                                                                                                                                                   | n/a    | n/a                | n/a    | n/a    | ESS 4 & 5                                                                                                 |
| Party Member             | Supporters who self-identified as party members                                                                                                                                                                                                    | 0.082  | 0.27               | 0      | 1      | ESS 4 & 5 'mmbprty' and ESS 4 & 5                                                                         |
| Benefits                 | Index of benefits, looking at the rights granted to members for selecting the party leader, selecting candidates, or adopting the election manifesto.                                                                                              | 0.348  | 0.263              | 0      | 1      | PPDB                                                                                                      |
| Financial Cost           | The minimum annual dues as a percentage of each country's average annual wage                                                                                                                                                                      | 0.089  | 0.061              | .01    | .29    | PPDB                                                                                                      |
| Net Benefits             | Benefits relative to cost                                                                                                                                                                                                                          | 0.259  | 0.259              | -0.17  | 0.98   | Constructed by the authors using PPDB data. For details see Kosiara-Pedersen, Scarrow and van Haute 2017. |
| Ideological Incongruence | Absolute difference between the respondent's ideological extremeness and the mean among all respondents who self-identified as supporters of the respondent's party. The larger the distance, the more incongruence between members and supporters | 0.936  | 0.636              | 0      | 3.1323 | Constructed by the authors using ESS 4 & 5 'lrscale' (11 point scale; 0=Left, 10=Right)                   |
| Religiosity              | Difference between the respondent's religious attendance and the mean among all respondents who self-identified as supporters of each party.                                                                                                       | -3.456 | 1.848              | -5.786 | 3.374  | Inverse scale from ESS 4 & 5 'reattend' (7 point scale)                                                   |
| Income                   | Difference between the respondent's income decile and the mean among all respondents who self-identified as supporters of each party.                                                                                                              | 0.0509 | 2.568              | -6.976 | 6.662  | ESS 4 & 5 'hinctnta' (10 point scale)                                                                     |

|                  |                                                                                                                             |       |        |         |        |                                     |
|------------------|-----------------------------------------------------------------------------------------------------------------------------|-------|--------|---------|--------|-------------------------------------|
| Age              | Difference between the respondent's age and the mean among all respondents who self-identified as supporters of each party. | 0.240 | 15.589 | -37.355 | 39.238 | ESS 4 & 5 'agea'                    |
| Union Membership | Membership of trade union (or similar organization) of the respondent                                                       | 0.337 | 0.473  | 0       | 1      | ESS 4 & 5 'mbtru' (0=no; 1=yes)     |
| Female           | Gender of the respondent                                                                                                    | 0.465 | 0.499  | 0       | 1      | ESS 4 & 5 'gndr' (0=male; 1=female) |
